# Supplementary material
Source: PubMed Central journal article supplement (PMC7062180)
Supplement: supp_RA119.011572_156617_1_supp_462184_q4gynf.pdf [file supp_RA119.011572_156617_1_supp_462184_q4gynf.pdf]

*(R,R)*-1,12-dimethylspermine as a modulator of abnormal polyamine levels in Snyder-Robinson Syndrome

**Tracy Murray Stewart<sup>1</sup>, Maxim Khomutov<sup>2</sup>, Jackson R. Foley<sup>1</sup>, Xin Guo<sup>3</sup>, Cassandra E. Holbert<sup>1</sup>, Tiffany T. Dunston<sup>1</sup>, Charles E. Schwartz<sup>4</sup>, Kathleen Gabrielson<sup>3</sup>, Alex R. Khomutov<sup>2</sup>, and Robert A. Casero, Jr.<sup>1\*</sup>**

## **Supporting Information**

**Fig. S1**

**Fig. S2**

**Fig. S3**

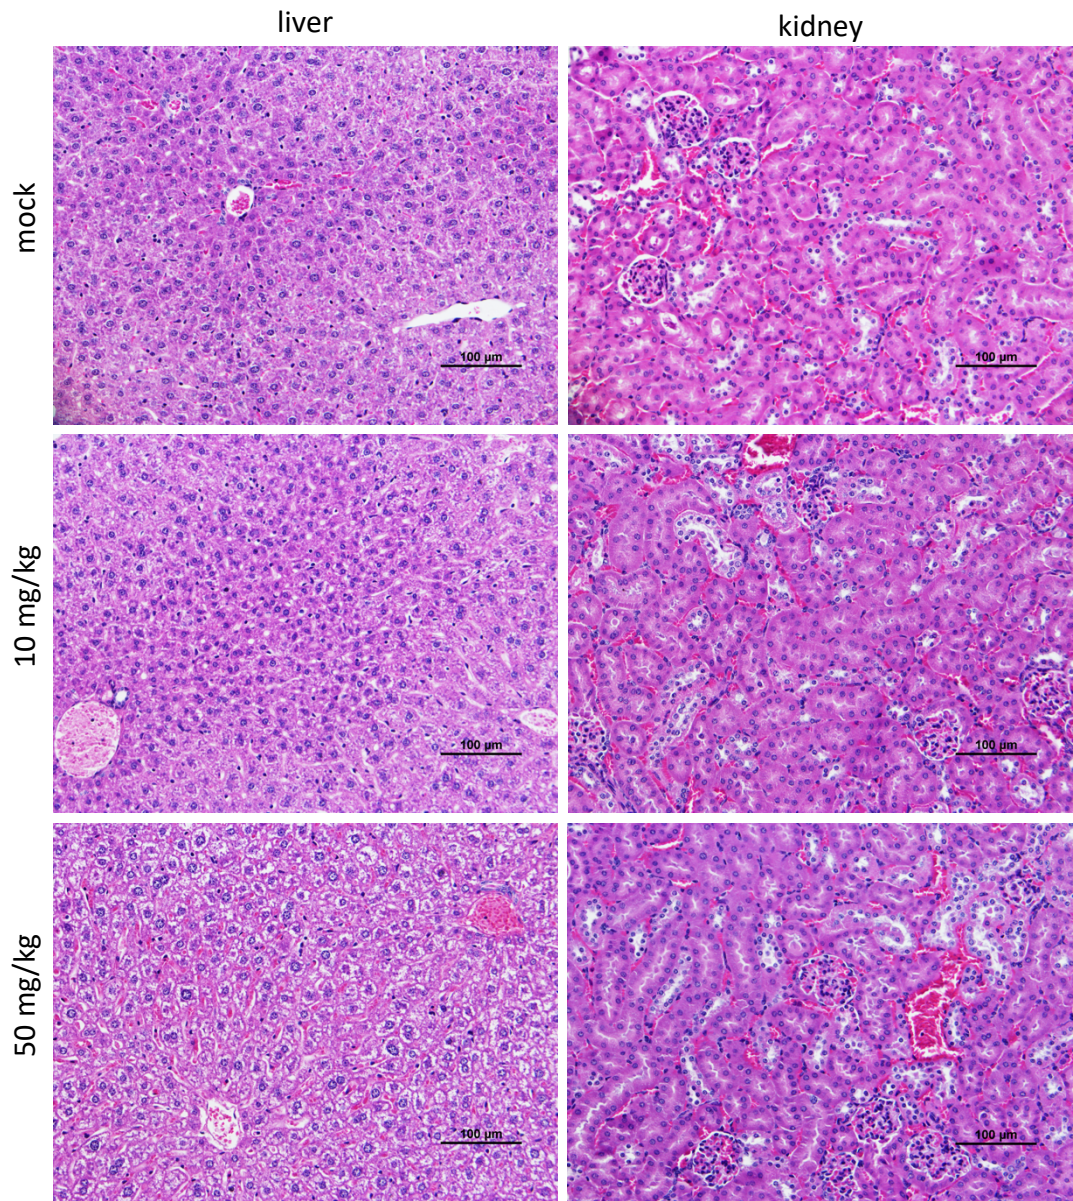

**Fig. S1.** Representative images of H&E-stained liver (left) and kidney (right) from mock, 10 mg/kg, and 50 mg/kg mouse treatment groups.

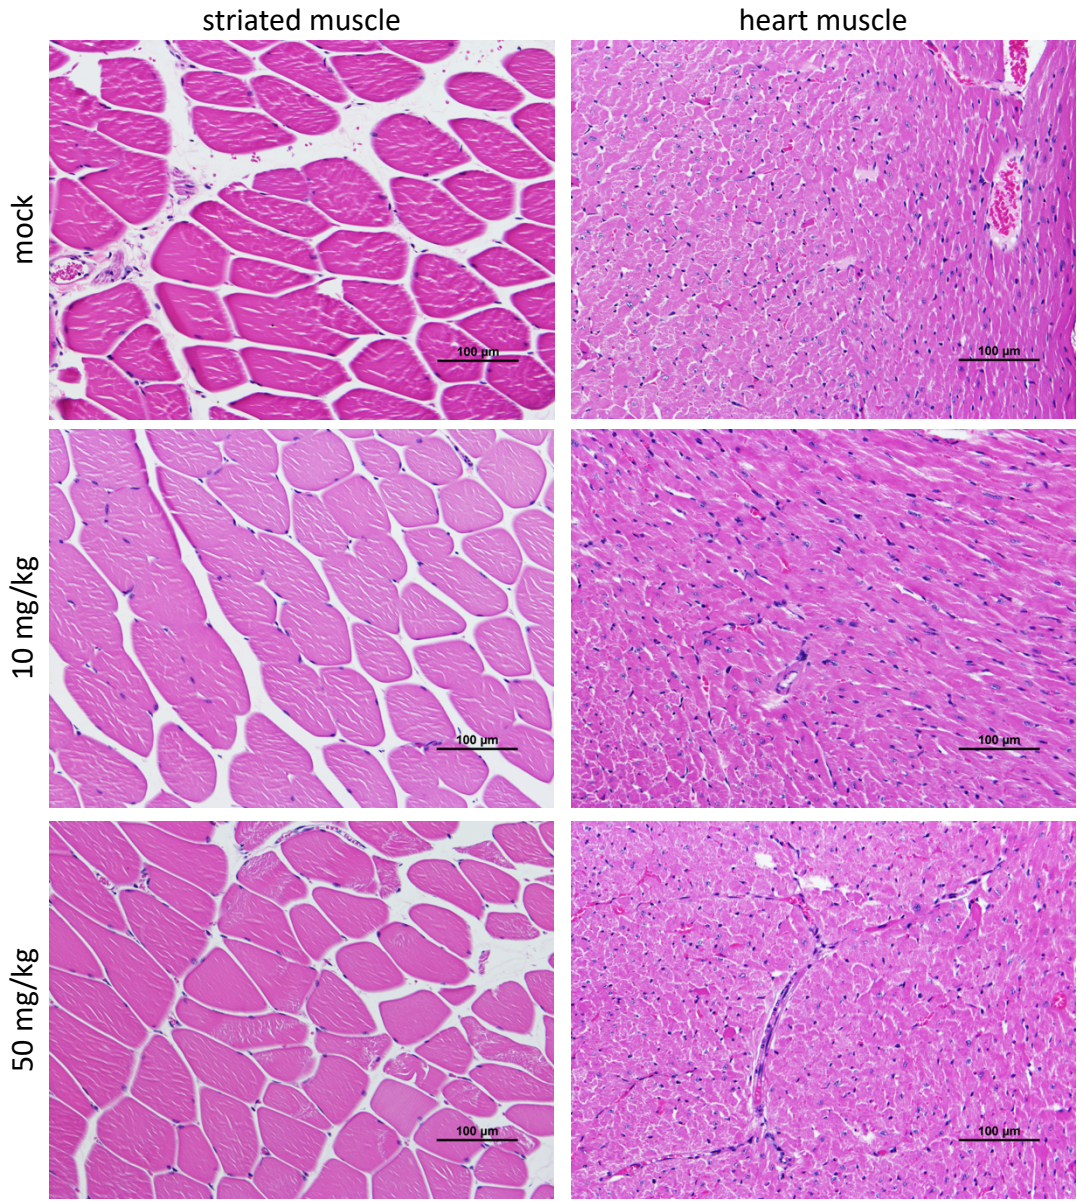

**Fig. S2.** Representative images of H&E-stained hindlimb striated muscle (left) and heart muscle (right) from mock, 10 mg/kg, and 50 mg/kg mouse treatment groups.

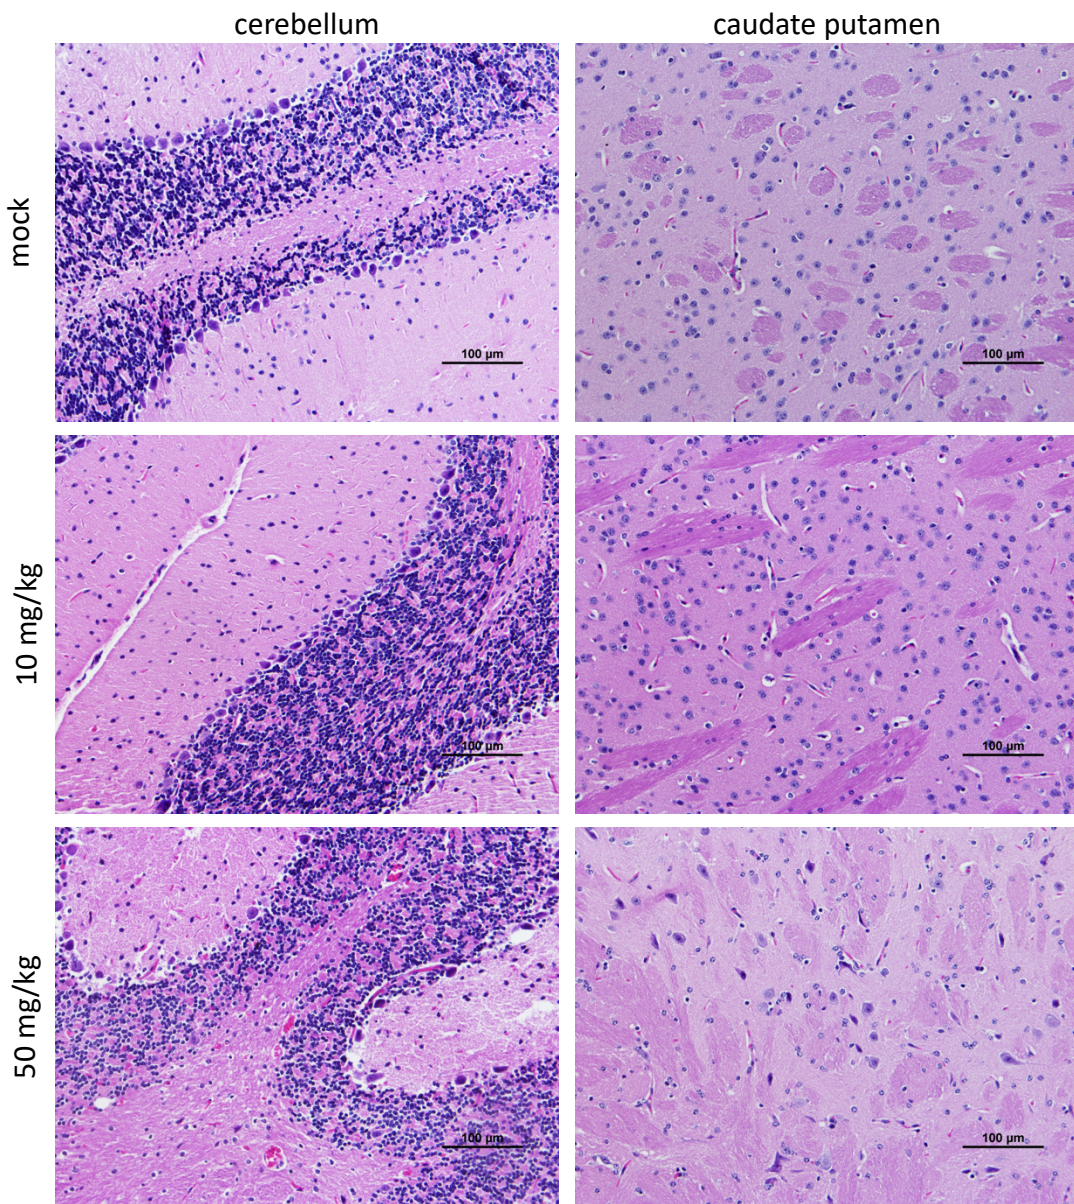

**Fig. S3.** Representative images of H&E-stained cerebellum (left) and caudate putamen (right) from mock, 10 mg/kg, and 50 mg/kg mouse treatment groups.
